# Supplementary material for: Vacuum pyrolysis depolymerization of waste polystyrene foam into high-purity styrene using a spirit lamp flame for convenient chemical recycling
Source: Royal Society of Chemistry journal article supplement (doi:10.1039/d3su00207a), 2023-01-01
Supplement: d3su00207a1.pdf [file d3su00207a1.pdf]

Electronic Supplementary Information (ESI)

## Vacuum pyrolysis depolymerization of waste polystyrene foam into high-purity styrene using spirit lamp flame for convenient chemical recycling

Eri Yoshida

*Department of Applied Chemistry and Life Science, Toyohashi University of Technology  
1-1 Hibarigaoka, Tempaku-cho, Toyohashi 441-8580, Japan*

E-mail: yoshida.eri.gu@tut.jp

Content:

Supplementary Figure S1: Mass spectrum of the recovered styrene.

Supplementary Figure S2: GPC profiles of polystyrenes for the recovered styrene and pure styrene.

Supplementary Figure S3: Calculation of the spatial dimensions of the PS chain end.

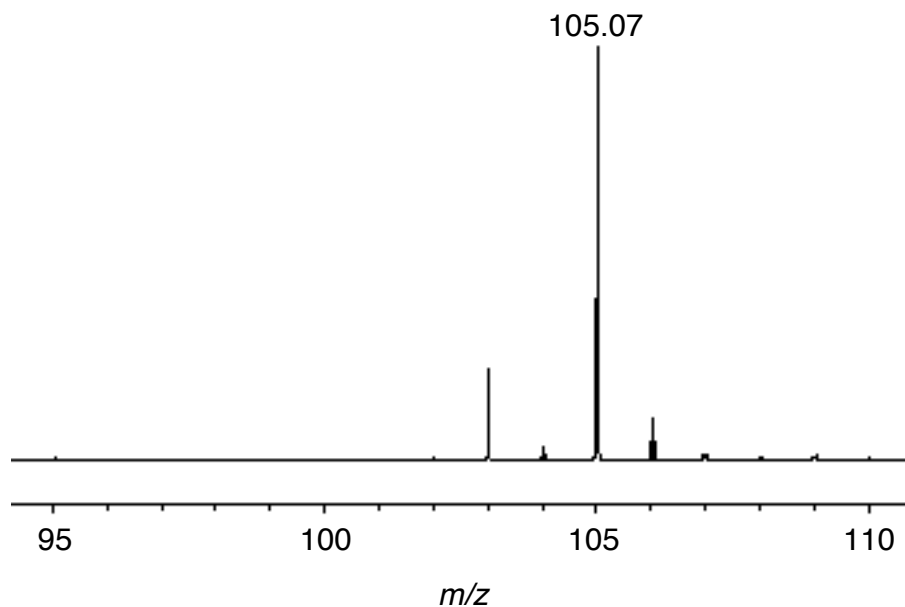

Figure S1. Mass spectrum of the styrene recovered by the vacuum pyrolysis of the waste PS foam. TOF-MS with the APCI method. Eluent: methanol.  $m/z = 105$  ( $M+1$ ).

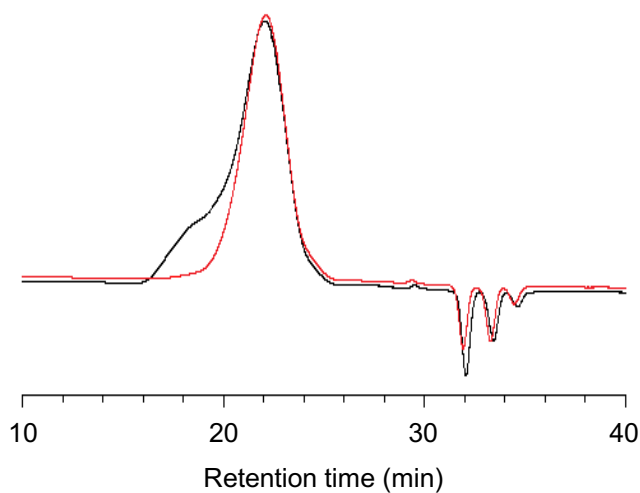

Figure S2. GPC profiles of polystyrenes prepared from the recovered styrene (red) and pure styrene (black). The polymerization was carried out in bulk using AIBN as the initiator (3 mol%) at 60 °C for 7 h under an N<sub>2</sub> atmosphere.

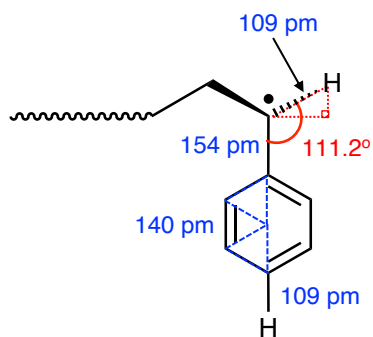

$$109 \sin(111.2 - 90) + 154 + 140 \times 2 + 109 = 582.4 \text{ pm}$$

Figure S3. Calculation of the spatial dimensions of the PS chain end using bond lengths and angles.
